# Supplementary material
Source: PubMed Central journal article supplement (PMC10765508)
Supplement: science.abj0299_sm.pdf [file science.abj0299_sm.pdf]

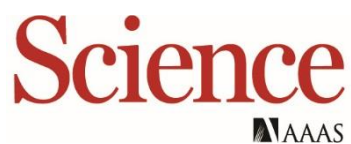

## Supplementary Materials for

### **Immune correlates of protection by mRNA-1273 vaccine against SARS-CoV-2 in nonhuman primates**

Kizzmekia S. Corbett *et al.*

Corresponding authors: Barney S. Graham, [bgraham@nih.gov](mailto:bgraham@nih.gov); Robert A. Seder, [rseder@mail.nih.gov](mailto:rseder@mail.nih.gov)

*Science* **373**, eabj0299 (2021)  
DOI: 10.1126/science.abj0299

#### **The PDF file includes:**

Figs. S1 to S11  
Tables S1 to S5

#### **Other Supplementary Material for this manuscript includes the following:**

MDAR Reproducibility Checklist

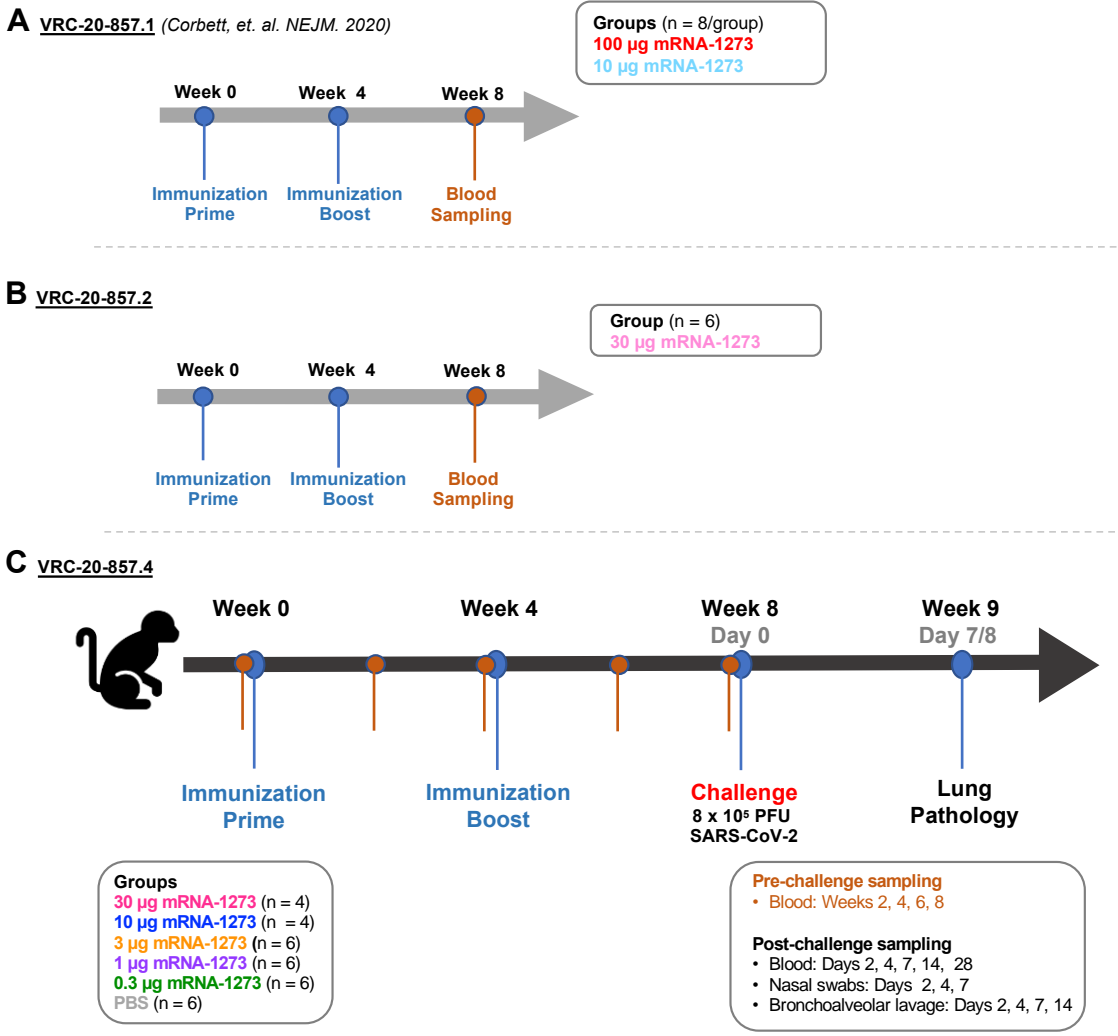

**Fig. S1. Study design: Evaluation of immune correlates of protection of mRNA-1273 in rhesus macaques.** (A and B) The design of the correlates of protection study (C) was informed by previous studies to assess the immunogenicity of various doses of mRNA-1273 in NHPs. (C) To assess immune correlates of protection, Rhesus macaques were immunized at 0 and 4 weeks with PBS or various doses of mRNA-1273 and challenged 4 weeks post-boost with a total of  $8 \times 10^5$  PFU of SARS-CoV-2. The viral inoculum was administered as  $6 \times 10^5$  PFU in 3 ml intratracheally and  $2 \times 10^5$  PFU in 1 ml intranasally (0.5 ml into each nostril). Sera were collected pre-

immunization and bi-weekly post-prime and post-boost. Sera, nasal washes, and bronchoalveolar lavages were collected post-challenge on days 2, 4, 7, 14, and 28. Lung pathology was assessed on days 7 and 8 post-challenge in a subset of animals (n=1 or 2 per group). Pre-challenge serological assessments are overlaid within applicable figures where squares represent experiments VRC-20-857.1 (A) and VRC-20-857.2 (B), and circles represent experiment VRC-20-857.4 (C).

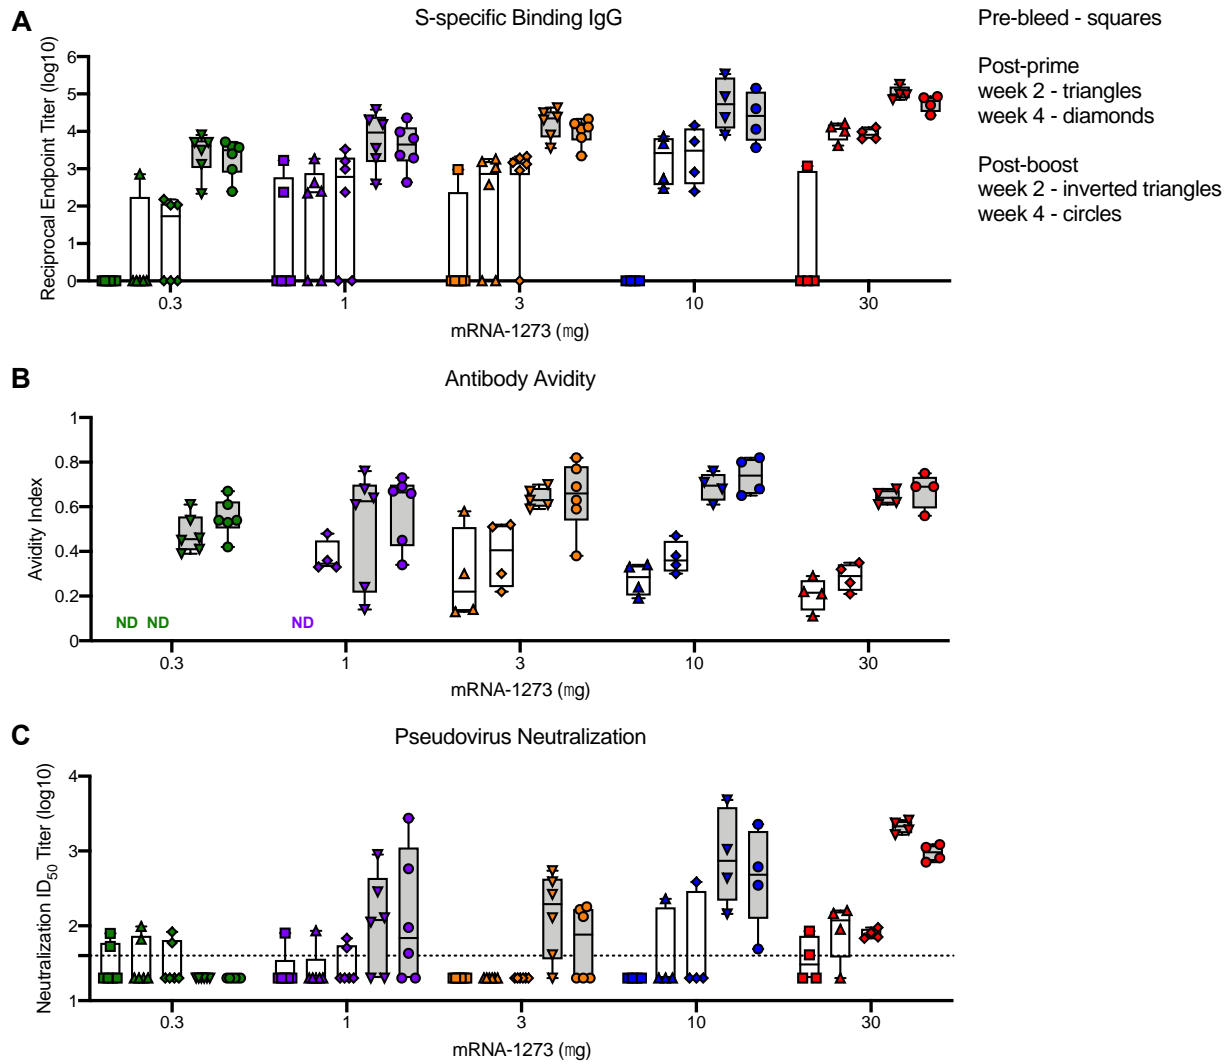

**Fig. S2. Temporal serum antibody responses following mRNA-1273 immunization.** Rhesus macaques were immunized according to Fig. S1C. Sera collected at week 0 (pre-bleed, unfilled bars) and 2- and 4-weeks post-prime (unfilled bars) and post-boost (filled bars) and subsequently assessed for SARS-CoV-2 S-specific IgG (A), antibody avidity (B), and SARS-CoV-2 D614G lentiviral-based pseudovirus neutralization (C). Symbols represent individual NHPs. Boxes and horizontal bars denote interquartile ranges (IQR) and medians, respectively. Whisker endpoints are equal to the maximum and minimum values. Dotted lines indicate assay limit of detection, where applicable. ND: not determined due to low-level S-specific binding antibody titers.

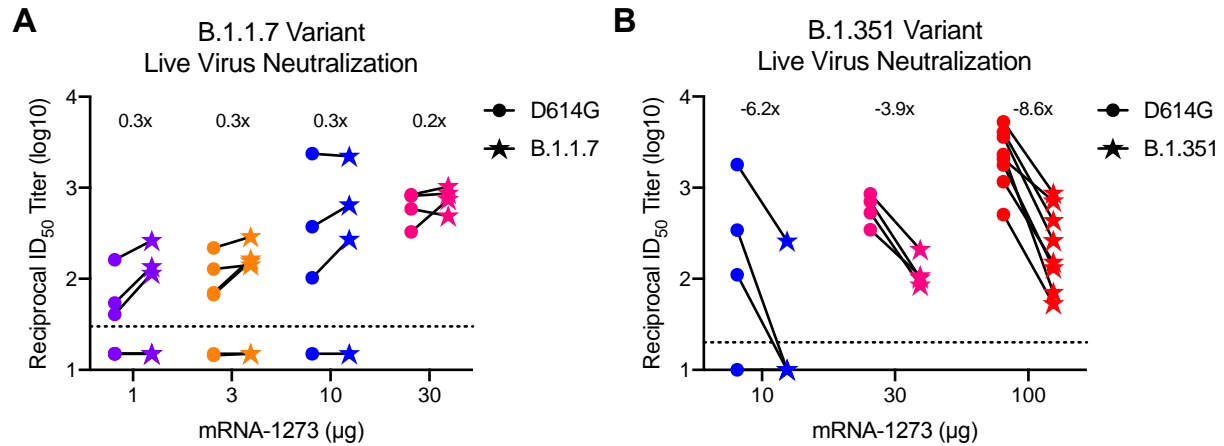

**Fig. S3. Ability of mRNA-1273 immune NHP serum to neutralize global variants.** Rhesus macaques were immunized according to Fig. S1C. Sera collected 4-weeks post-boost, were assessed for focus reduction neutralization using D614G-encompassing SARS-CoV-2 EHC-83E compared to B.1.1.7 (A) and B.1.351 (B) SARS-CoV-2 variants. Symbols represent individual NHPs. For each immunogen group, the geometric mean titer (GMT) for each variant was compared to D614G and the fold difference is indicated above respective distributions.

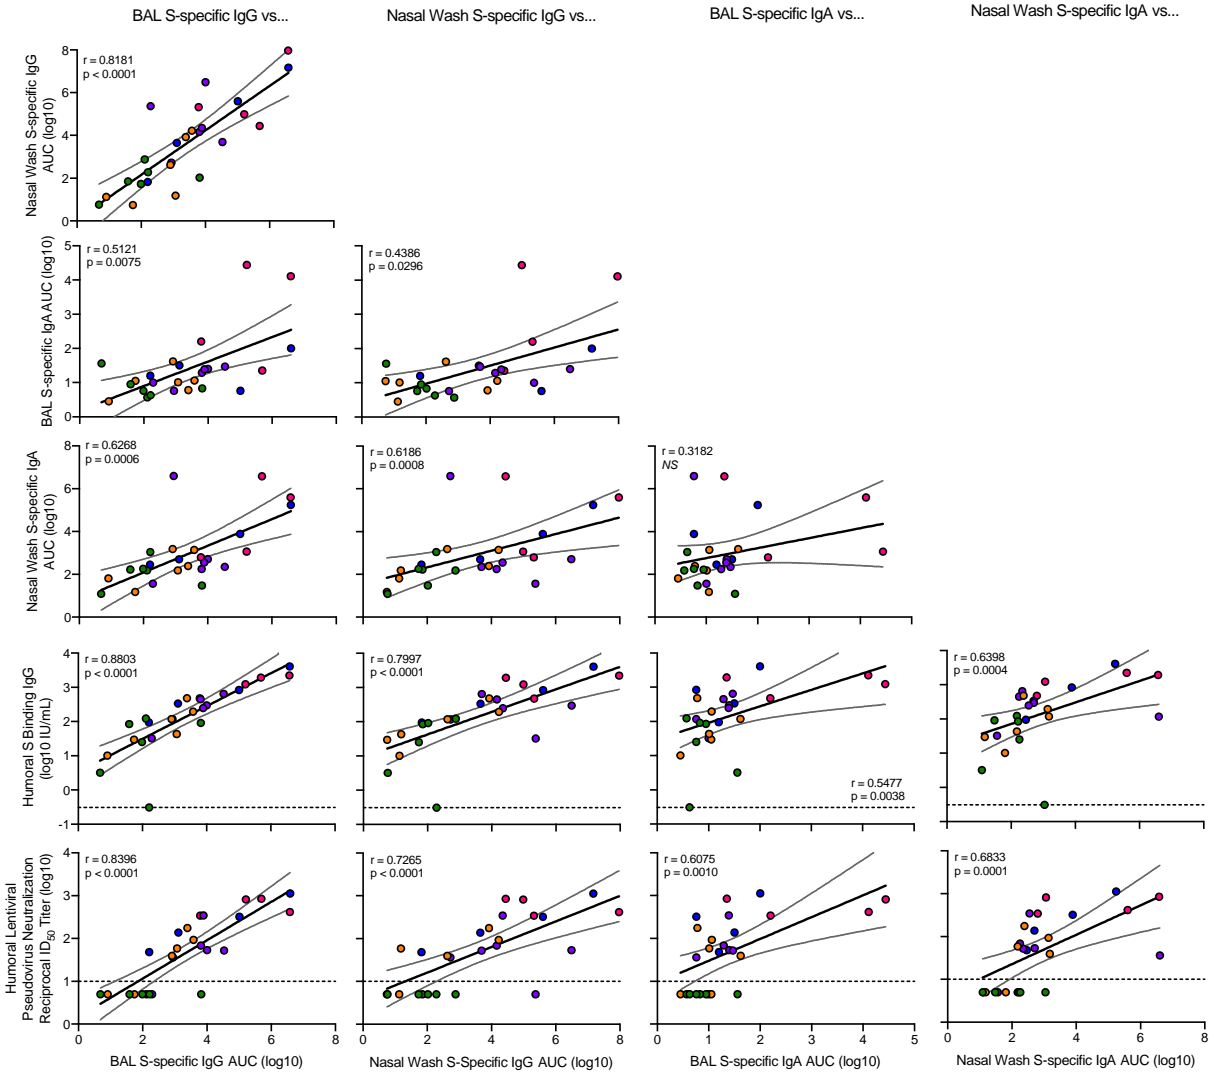

**Fig. S4. Correlations of mucosal antibody responses to humoral antibody responses.** Rhesus macaques were immunized according to Fig. S1C. Plots show correlations between S-specific BAL IgG, nasal wash IgG, BAL IgA, and nasal wash IgA at week 2 post-boost with each other and with humoral S-specific IgG and lentiviral-based pseudovirus neutralization at week 4 post-boost. Circles represent individual NHPs, where colors indicate mRNA-1273 dose. Dotted lines indicate assay limits of detection. Black and gray lines indicate linear regression and 95% confidence interval, respectively. “ $r$ ” represents Spearman’s correlation coefficients, and “ $P$ ” the corresponding  $P$ -values.

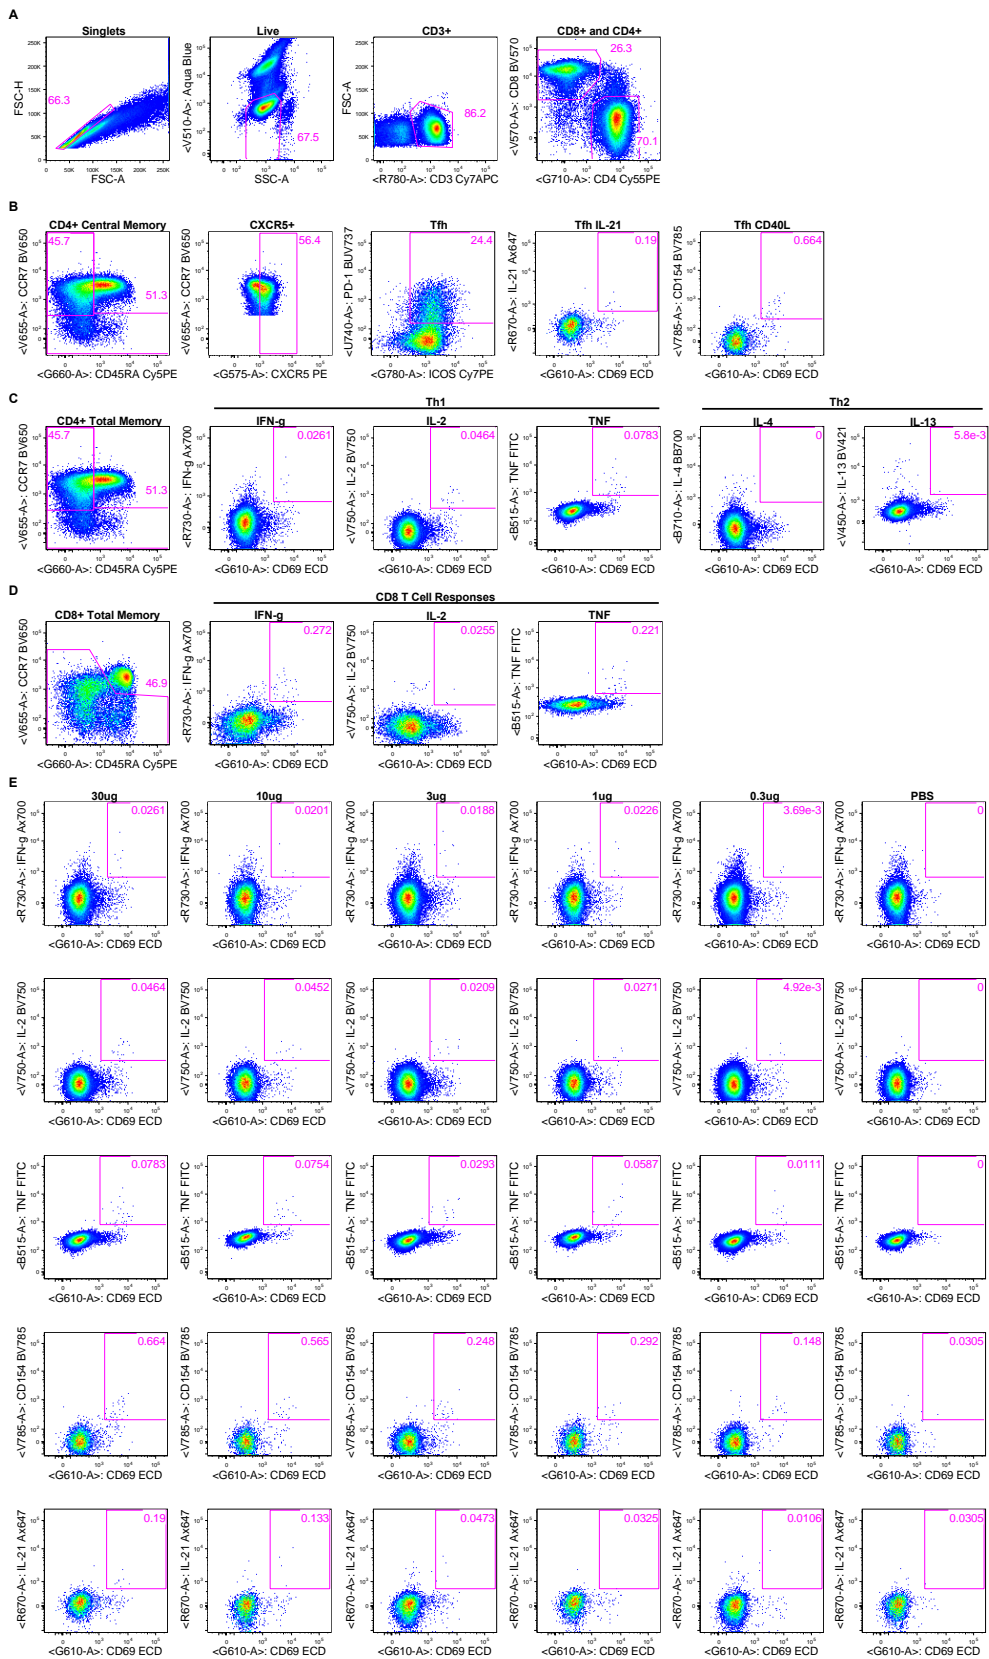

**Fig S5. Gating tree and representative staining for S-specific Th1, Th2, Tfh and CD8**

**responses.** Flow cytometry plots from a representative NHP that showed Th1 and CD8 T cell cytokine responses to best display staining of all populations and production of all cytokines (A-D). (A) T cell populations were selected by subsequent gating: first single cells, followed by live/SSC low cells, then CD3<sup>+</sup>/FSC low cells, and finally CD4<sup>+</sup> and CD8<sup>+</sup> T cells. (B) To identify Tfh, CD4 T cells were gated first on central memory (CM) T cells (CCR7<sup>+</sup>CD45RA<sup>-</sup>) then CXCR5<sup>+</sup> CM cells followed by PD-1<sup>+</sup>ICOS<sup>+</sup> cells. Then, to measure IL-21 production and CD40L (CD154) expression from Tfh, CD69<sup>+</sup>IL-21<sup>+</sup> and CD69<sup>+</sup>CD154<sup>+</sup> cells were gated. (C and D) Cytokine production from total memory CD4 and CD8 T cells was measured by first gating on total memory T cells (central memory (CCR7<sup>+</sup>CD45RA<sup>-</sup>), effector memory (CCR7<sup>-</sup>CD45RA<sup>-</sup>), and terminal effector memory (CCR7<sup>-</sup>CD45RA<sup>+</sup>) T cells), then CD69<sup>+</sup>cytokine<sup>+</sup> cells. (E) Representative Th1 and Tfh plots from a one animal in each mRNA 1273 vaccine dose group.



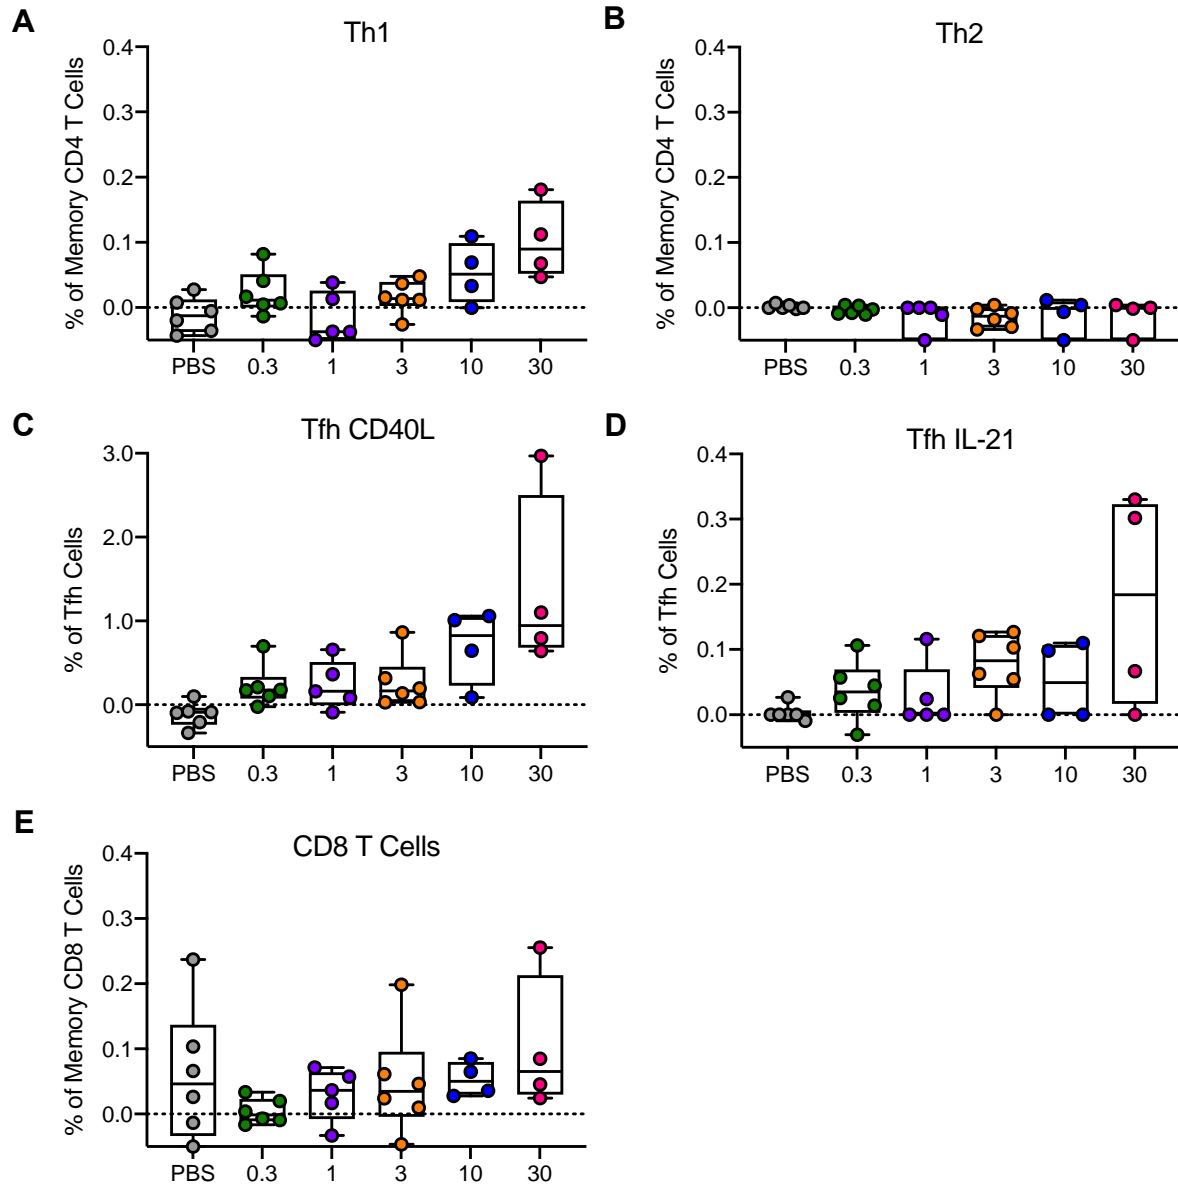

**Fig. S6. T cell responses following mRNA-1273 immunization.** Rhesus macaques were immunized according to Fig. S1C. Intracellular staining was performed on PBMCs as described in Fig.S5Methods at week 6 (2 weeks following boost), to assess T cell responses to SARS-CoV-2 S S1 and S2 peptide pools. Background-subtracted responses to S1 and S2 individual peptide pools were summed. (A) Th1 responses (IFN $\gamma$ , IL-2, or TNF), (B) Th2 responses (IL-4 or IL-13), (C) Tfh CD40L upregulation (peripheral follicular helper T cells (Tfh) were gated on central

memory CXCR5<sup>+</sup>PD-1<sup>+</sup>ICOS<sup>+</sup> CD4 T cells), (D) Tfh IL-21, and (E) CD8 T cell responses (IFN $\gamma$ , IL-2, or TNF) were assessed. Boxes and horizontal bars denote IQR and medians, respectively. Whisker endpoints are equal to the maximum and minimum values. Circles represent individual NHPs. Dotted lines are set to 0%.

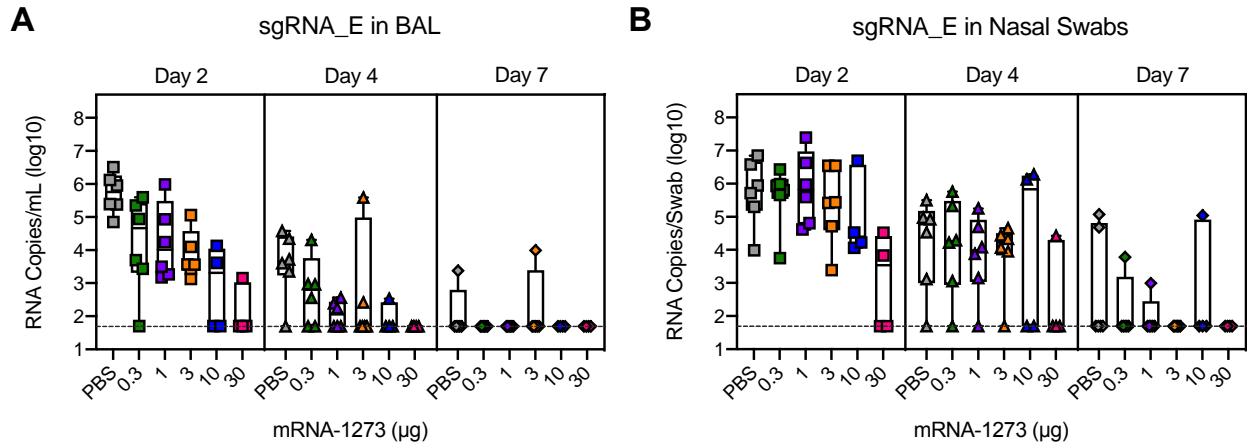

**Fig. S7. Efficacy of mRNA-1273 against upper and lower respiratory viral replication.** Rhesus macaques were immunized and challenged as described in Fig. S1C. BAL (A) and NS (B) were collected on days 2 (squares), 4 (triangles), and 7 (diamonds) post-challenge, and viral replication was assessed by detection of SARS-CoV-2 E-specific sgRNA. Boxes and horizontal bars denote the IQR and medians, respectively; whisker end points are equal to the maximum and minimum values. Symbols represent individual NHPs and overlap for equal values where constrained. Dotted lines indicate assay limits of detection.

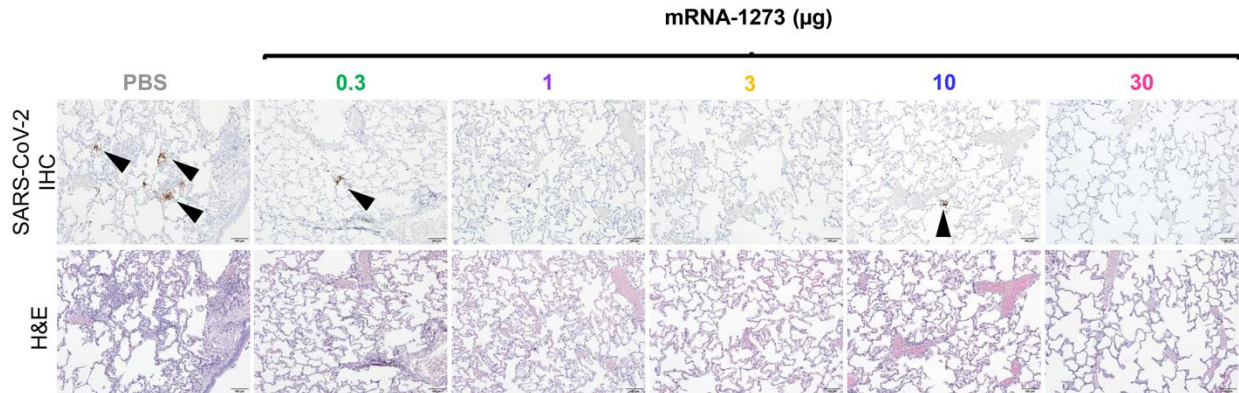

**Fig. S8. Post-challenge lung histopathological analysis and viral detection.** Rhesus macaques were immunized and challenged as described in Fig. S1C. Seven days after challenge, lung samples (n=1 per group) were evaluated for evidence of virus infection (top) and the presence of inflammation (bottom). Representative images show the location and distribution of SARS-CoV-2 virus antigen by IHC in serial lung tissue sections. Arrows indicate areas positive for viral antigen. Each image is taken at 10X magnification. Scale bars represent 100  $\mu$ m.

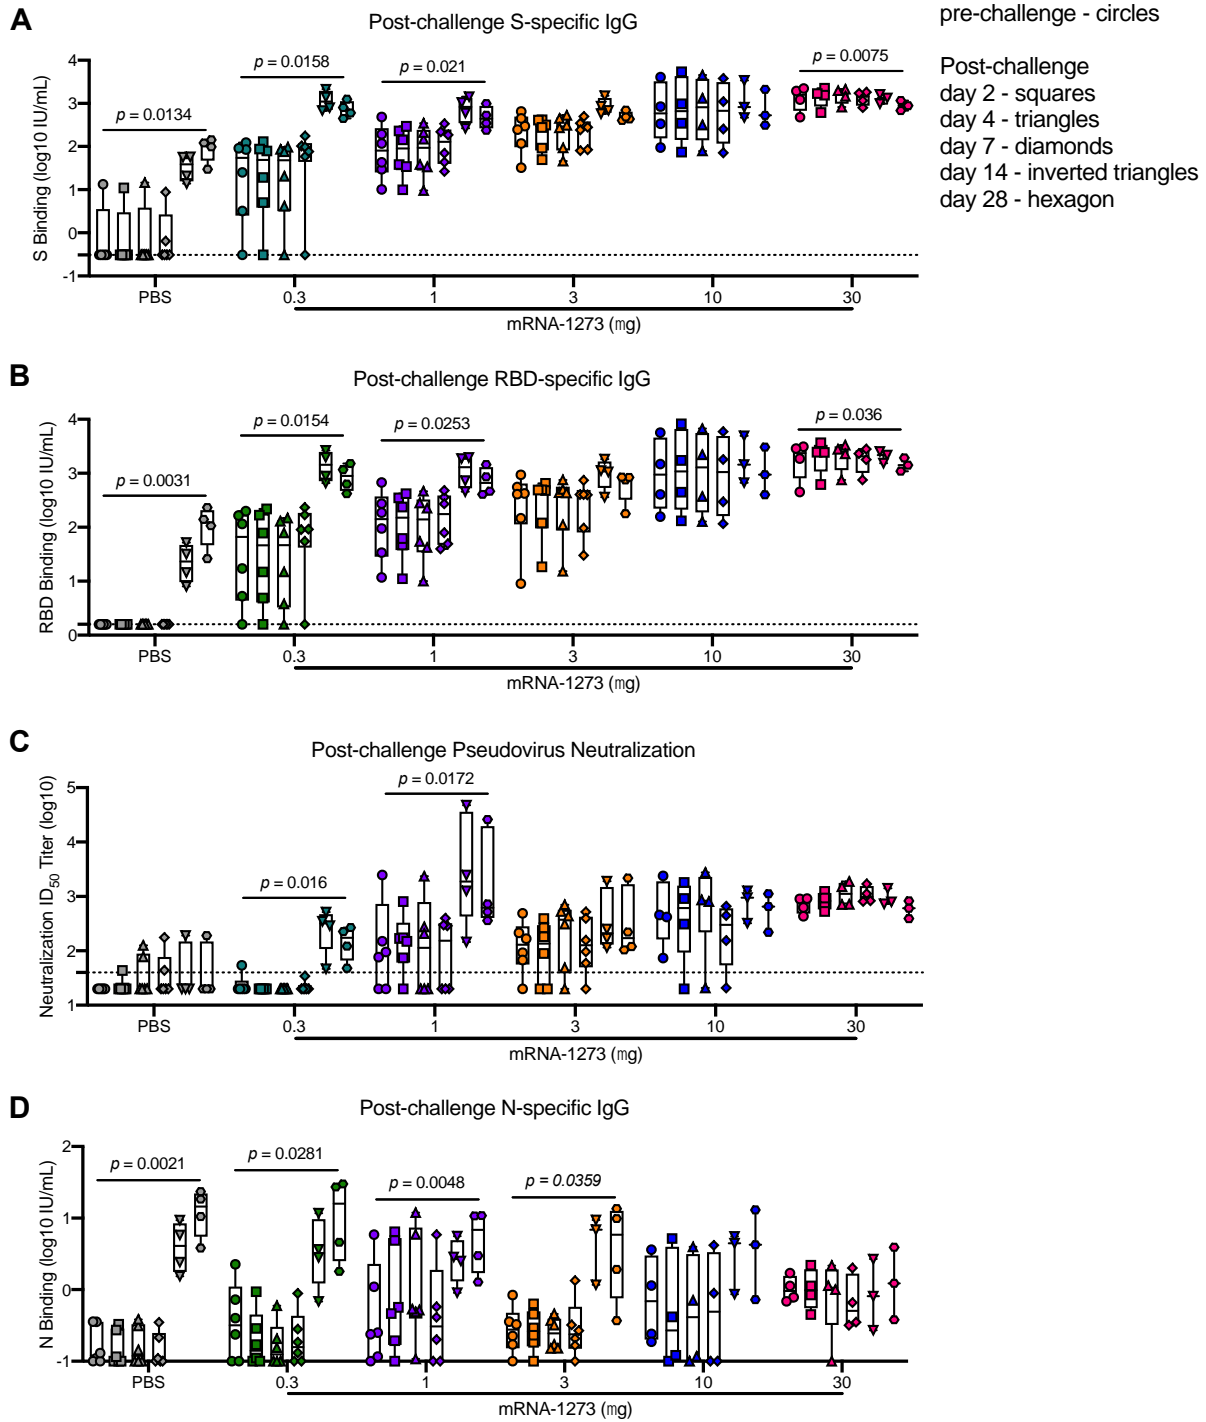

**Fig. S9. Humoral antibody responses following SARS-CoV-2 challenge in mRNA-1273-immunized NHPs.** Rhesus macaques were immunized and challenged according to Fig. S1C. Sera collected 4 weeks post-boost, immediately prior to challenge, and days 2, 4, 7, 14, and 28 post-

challenge were assessed for SARS-CoV-2 S-specific (A), RBD-specific (B), and N-specific (D) IgG by MULTI-ARRAY ELISA and SARS-CoV-2 D614G lentiviral-based pseudovirus neutralization (C). Boxes and horizontal bars denote the IQR and medians, respectively. Whisker endpoints are equal to the maximum and minimum values. Symbols represent individual NHPs. Dotted lines indicate assay limits of detection. Significance between pre-challenge and the final timepoint post-challenge determined by paired *t* tests.

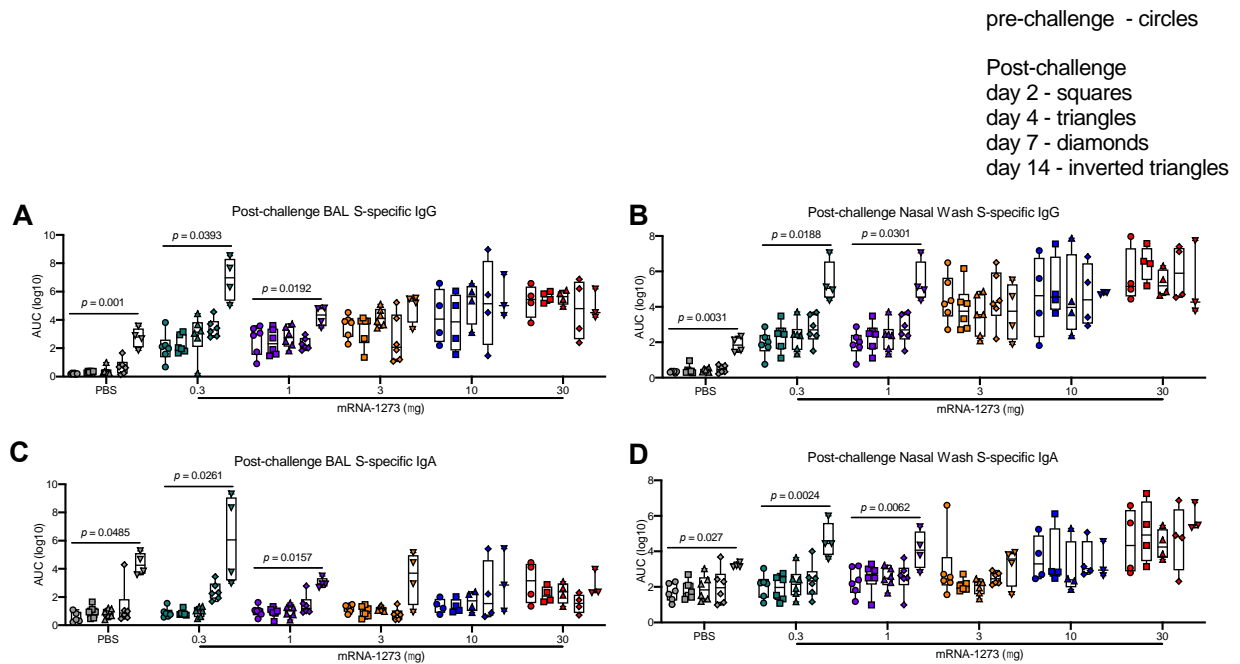

**Fig. S10. Mucosal antibody responses following SARS-CoV-2 challenge in mRNA-1273-immunized NHPs.** Rhesus macaques were immunized and challenged according to Fig. S1C. BAL (A and C) and nasal washes (B and D) collected 2 weeks post-boost and days 2, 4, 7, and 14 post-challenge were assessed for SARS-CoV-2 S-specific IgG (A and B) and IgA (C and D) by MULTI-ARRAY ELISA. Boxes and horizontal bars denote the IQR and medians, respectively. Whisker endpoints are equal to the maximum and minimum values. Circles represent individual NHPs. Significance between pre-challenge and the final timepoint post-challenge determined by paired *t* tests.

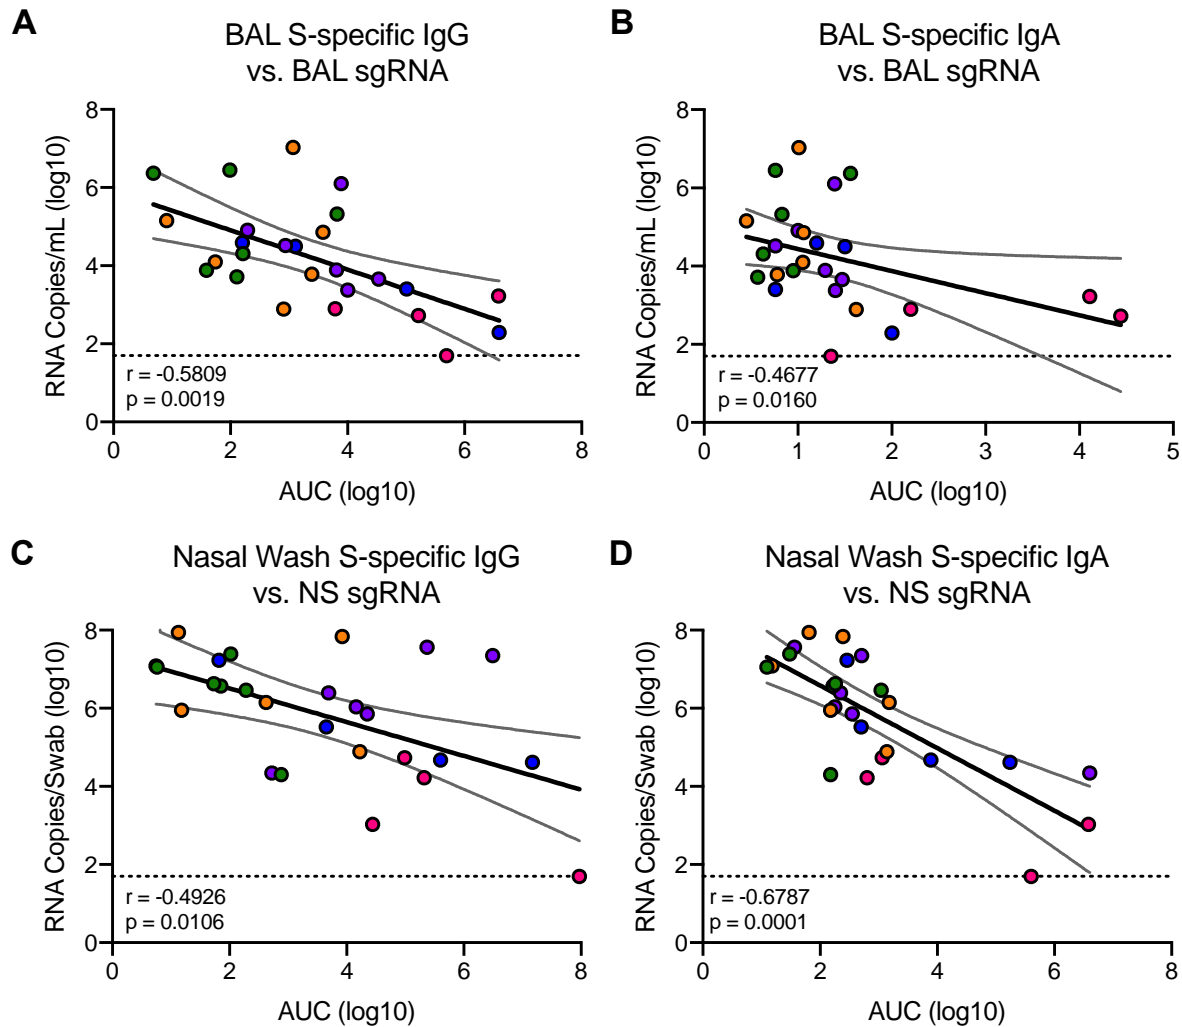

**Fig. S11. Correlations of mucosal antibody responses and viral replication.** Rhesus macaques were immunized and challenged according to Fig. S1C. Plots show correlations between BAL (A and B) and NS (C and D) S-specific IgG (A and C) and IgA (B and D) at week 2 post-boost with SARS-CoV-2 N-specific sgRNA in BAL (A and B) and NS (C and D) at day 2 post-challenge. Circles represent individual NHPs, where colors indicate mRNA-1273 dose. Dotted lines indicate PCR limit of detection. Black and gray lines indicate linear regression and 95% confidence interval, respectively. “ $r$ ” represents Spearman’s correlation coefficients, and “ $P$ ” the corresponding  $P$ -values.



| NHP ID  | Post-challenge<br>(Day) | mRNA-1273<br>( $\mu$ g) | Inflammation<br>(H&E) <sup>1</sup> | SARS-CoV-2 Ag <sup>2</sup> (Lc <sup>3</sup> ;<br>Rmid <sup>4</sup> ; Rc <sup>5</sup> ) |
|---------|-------------------------|-------------------------|------------------------------------|----------------------------------------------------------------------------------------|
| 15D043  | 7                       | PBS                     | ++                                 | -; +; +/-                                                                              |
| A15V047 | 8                       | PBS                     | ++                                 | +/-; -; +/-                                                                            |
| LP73    | 7                       | 0.3                     | +                                  | -; -; +/-                                                                              |
| G45R    | 8                       | 0.3                     | ++                                 | -; -; -                                                                                |
| A16V036 | 7                       | 1                       | +                                  | -; -; -                                                                                |
| A15V075 | 8                       | 1                       | +                                  | +/-; -; -                                                                              |
| 16C282  | 7                       | 3                       | +                                  | -; -; -                                                                                |
| 15D025  | 8                       | 3                       | +                                  | -; -; +/-                                                                              |
| A15V037 | 7                       | 10                      | +/-                                | -; -; +/-                                                                              |
| 16C225  | 7                       | 30                      | +/-                                | -; -; -                                                                                |

**Table S1.** Assessment of lung inflammation and viral antigen following SARS-CoV-2 challenge of mRNA-1273-immunized NHPs.

Lung tissue was evaluated for the presence of inflammation and SARS-CoV-2 viral antigen.

<sup>1</sup> Inflammation scoring: +/- = minimal to mild, + = mild to moderate, ++ = moderate to severe

<sup>2</sup> Immunohistochemistry SARS-CoV-2 antigen (Ag): - = no detection of virus Ag, +/- = rare/occasional Ag<sup>+</sup> foci, + = multiple Ag<sup>+</sup> foci

<sup>3</sup> Lc: left caudal lung lobe

<sup>4</sup> Rmid: right middle lung lobe

<sup>5</sup> Rc: right caudal lung lobe

**A**

**Linear Regression**

| Outcome                   | Week 4 Post-boost<br>Antibody Measurement | Univariate                 |                     |                   | Multivariate                      |                     |           |                 | Adj<br>R <sup>2</sup> | Antibody<br>measurement<br>meets criteria for<br>Potential CoP? |
|---------------------------|-------------------------------------------|----------------------------|---------------------|-------------------|-----------------------------------|---------------------|-----------|-----------------|-----------------------|-----------------------------------------------------------------|
|                           |                                           | Outcome ~ Antibody measure |                     |                   | Outcome ~ Antibody measure + dose |                     |           |                 |                       |                                                                 |
|                           |                                           | Beta<br>Antibody           | P-value<br>Antibody | AdjR <sup>2</sup> | Beta<br>Antibody                  | P-value<br>Antibody | Beta dose | P-value<br>dose |                       |                                                                 |
| BAL<br>Day 2<br>sgRNA_N   | S-specific IgG                            | -0.885                     | 0.001               | 0.35              | -0.581                            | 0.093               | -0.554    | 0.214           | 0.36                  | Yes                                                             |
|                           | RBD-specific IgG                          | -0.936                     | <0.001              | 0.38              | -0.659                            | 0.050               | -0.513    | 0.223           | 0.39                  | Yes                                                             |
|                           | ACE2 Binding Inhibition                   | -0.957                     | <0.001              | 0.49              | -1.029                            | 0.008               | 0.122     | 0.812           | 0.47                  | Yes                                                             |
|                           | Lentivirus Pseudovirus Neutralization     | -0.844                     | 0.005               | 0.25              | -0.252                            | 0.606               | -0.849    | 0.153           | 0.29                  | Yes                                                             |
|                           | VSV Pseudovirus Neutralization            | -0.758                     | 0.031               | 0.19              | -0.256                            | 0.553               | -1.066    | 0.103           | 0.27                  | Yes                                                             |
| Live Virus Neutralization | -1.218                                    | 0.001                      | 0.41                | -0.933            | 0.053                             | -0.515              | 0.371     | 0.41            | Yes                   |                                                                 |
| NS<br>Day 2<br>sgRNA_N    | S-specific IgG                            | -0.966                     | 0.003               | 0.29              | -0.499                            | 0.222               | -0.851    | 0.115           | 0.34                  | Yes                                                             |
|                           | RBD-specific IgG                          | -1.047                     | 0.001               | 0.34              | -0.645                            | 0.105               | -0.745    | 0.142           | 0.37                  | Yes                                                             |
|                           | ACE2 Binding Inhibition                   | -1.098                     | <0.001              | 0.47              | -1.065                            | 0.021               | -0.056    | 0.928           | 0.44                  | Yes                                                             |
|                           | Lentivirus Pseudovirus Neutralization     | -1.157                     | 0.001               | 0.36              | -0.770                            | 0.168               | -0.555    | 0.399           | 0.35                  | Yes                                                             |
|                           | VSV Pseudovirus Neutralization            | -1.027                     | 0.023               | 0.22              | -0.133                            | 0.789               | -1.898    | 0.017           | 0.41                  | No                                                              |
| Live Virus Neutralization | -1.497                                    | 0.003                      | 0.37                | -0.718            | 0.208                             | -1.41               | 0.056     | 0.46            | marginal              |                                                                 |

**B**

## Linear Regression

| Outcome | Week 2 Post-boost<br>T cell Measurement | Univariate                      |                      |                    | Multivariate                                     |                      |               |                      |                       | T-cell<br>measurement<br>predictive<br>after adjusting<br>for S-specific<br>IgG? |
|---------|-----------------------------------------|---------------------------------|----------------------|--------------------|--------------------------------------------------|----------------------|---------------|----------------------|-----------------------|----------------------------------------------------------------------------------|
|         |                                         | <u>Outcome ~ T-cell measure</u> |                      |                    | <u>Outcome ~ T-cell measure + S-specific IgG</u> |                      |               |                      |                       |                                                                                  |
|         |                                         | Beta<br>predictor               | p-value<br>predictor | Adj R <sup>2</sup> | Beta<br>predictor                                | P-value<br>predictor | Beta<br>S-IgG | P-<br>value<br>S-IgG | Adj<br>R <sup>2</sup> |                                                                                  |
| BAL     | IL-21                                   | -4.527                          | 0.080                | 0.09               | -0.471                                           | 0.812                | -1.326        | <0.001               | 0.54                  | No                                                                               |
| Day 2   | CD40L                                   | -1.284                          | 0.008                | 0.24               | -0.313                                           | 0.459                | -1.226        | <0.001               | 0.55                  | No                                                                               |
| sgRNA_N | Any Th1                                 | -17.106                         | 0.004                | 0.28               | -4.874                                           | 0.364                | -1.184        | 0.001                | 0.55                  | No                                                                               |
|         | Any Th2                                 | -74.749                         | 0.011                | 0.22               | -12.775                                          | 0.622                | -1.265        | <0.001               | 0.54                  | No                                                                               |
| NS      | IL-21                                   | -10.403                         | 0.000                | 0.46               | -7.801                                           | 0.002                | -0.851        | 0.011                | 0.59                  | Yes                                                                              |
|         | CD40L                                   | -2.151                          | 0.000                | 0.53               | -1.638                                           | 0.002                | -0.647        | 0.071                | 0.57                  | Yes                                                                              |
| Day 2   | Any Th1                                 | -22.922                         | 0.001                | 0.38               | -14.489                                          | 0.045                | -0.816        | 0.051                | 0.45                  | marginal                                                                         |
| sgRNA_N | Any Th2                                 | -67.906                         | 0.055                | 0.11               | -4.649                                           | 0.898                | -1.291        | 0.007                | 0.34                  | No                                                                               |

**Table S2. Summary of linear regression models examining relationships.** (A) Antibody measurements at week 4 post-boost and sgRNA in BAL or NS, with or without adjustment for dose. (B) T cell subsets at week 2 post-boost and sgRNA in BAL or NS, with or without adjustment for S-specific IgG. In all models, sgRNA, antibody measures, and dose are modeled on the log<sub>10</sub> scale. Antibody measures are considered to meet the criteria for potential correlates of protection from high sgRNA if they are significantly associated with sgRNA univariately and if dose is not statistically significant after adjustment for that potential antibody measure in a multivariate regression model. Gray shading for S-specific IgG represents the pre-specified primary correlate of interest.

**A**

| Variant | MUTLI-ARRAY ELISA   |
|---------|---------------------|
| WA-1    | <i>No mutations</i> |

**B**

| Variant | Pseudovirus |            |
|---------|-------------|------------|
|         | Lentiviral  | VSV        |
| WA-1    | <i>N/A</i>  | <i>N/A</i> |
| D614G   | 614G        | 614G       |

**C**

| Variant | Live Virus                                                              |
|---------|-------------------------------------------------------------------------|
| WA-1    | <i>N/A</i>                                                              |
| D614G   | 614G                                                                    |
| B.1.1.7 | $\Delta$ 69-70, $\Delta$ 144, 501Y, 570D, 614G, 681H, 716I, 982A, 1118H |
| B.1.351 | 18F, 80A, 215G, $\Delta$ 242-244, 417N, 484K, 501Y, 614G, 701V          |

**Table S3. Spike mutations included in MULTI-ARRAY ELISA (A), pseudovirus (B) and live-virus (C) assay reagents as compared to Wuhan-1 strain (Genbank #: MN908947.3).**

<sup>1</sup>N/A: not applicable

**Table S4. Glossary of Terms**

| <b>Abbreviation</b> | <b>Definition</b>                                                                                                 |
|---------------------|-------------------------------------------------------------------------------------------------------------------|
| <b>ACE2</b>         | Angiotensin-converting enzyme 2; host receptor for SARS-CoV-2                                                     |
| <b>AUC</b>          | Area under the curve                                                                                              |
| <b>B.1.1.7</b>      | Alpha variant of SARS-CoV-2; specific mutations denoted in Table S3                                               |
| <b>B.1.351</b>      | Beta variant of SARS-CoV-2; specific mutations denoted in Table S3                                                |
| <b>BAL</b>          | Bronchoalveolar lavage                                                                                            |
| <b>BNT162b2</b>     | mRNA vaccine by Pfizer/BioNTech                                                                                   |
| <b>CD40L</b>        | CD4+ T cell marker                                                                                                |
| <b>COVID-19</b>     | Coronavirus disease 2019                                                                                          |
| <b>D614G</b>        | Mutation of residue 614 in SARS-CoV-2 spike protein from aspartate to glycine                                     |
| <b>E</b>            | Viral envelope gene                                                                                               |
| <b>EHC-83E</b>      | D614G variant of SARS-CoV-2, isolated at Emory University in Georgia USA                                          |
| <b>ELISA</b>        | Enzyme Linked Immunosorbent Assay                                                                                 |
| <b>IgA</b>          | Immunoglobulin A                                                                                                  |
| <b>IgG</b>          | Immunoglobulin G                                                                                                  |
| <b>IHC</b>          | Immunohistochemistry                                                                                              |
| <b>IL-21</b>        | Interleukin-21; cytokine driver of B cell proliferation                                                           |
| <b>IU</b>           | International Units                                                                                               |
| <b>mRNA-1273</b>    | mRNA vaccine by Moderna                                                                                           |
| <b>N</b>            | Viral nucleocapsid gene                                                                                           |
| <b>NHP</b>          | Nonhuman primate                                                                                                  |
| <b>NS</b>           | Nasal swab; upper airway                                                                                          |
| <b>NTD</b>          | N-terminal domain                                                                                                 |
| <b>PFU</b>          | Plaque forming unit                                                                                               |
| <b>qRT-PCR</b>      | Real-time quantitative reverse transcription polymerase chain reaction                                            |
| <b>RBD</b>          | Receptor binding domain                                                                                           |
| <b>S</b>            | Spike protein of SARS-CoV-2                                                                                       |
| <b>S-2P</b>         | Spike ectodomain with 2 proline substitutions that stabilize the prefusion conformation of the spike glycoprotein |
| <b>SARS-CoV-2</b>   | Severe acute respiratory syndrome coronavirus 2                                                                   |

|                |                                                                        |
|----------------|------------------------------------------------------------------------|
| <b>sgRNA</b>   | subgenomic RNA                                                         |
| <b>sgRNA_N</b> | subgenomic RNA for viral nucleocapsid gene                             |
| <b>sgRNA_E</b> | subgenomic RNA for viral envelope gene                                 |
| <b>Tfh</b>     | T follicular helper cell; CD4+ T cell that drives B-cell proliferation |
| <b>vRNA</b>    | Viral RNA                                                              |
| <b>VSV</b>     | Vesicular stomatitis virus                                             |
| <b>WA-1</b>    | SARS-CoV-2 strain isolated in Washington USA                           |

**Tables S5. Reagents Used for Intracellular Staining.**

| Specificity   | Clone     | Fluoro-chrome | Vol. per 100 $\mu$ d                  | Step    | Manufacturer    | Purpose                          |
|---------------|-----------|---------------|---------------------------------------|---------|-----------------|----------------------------------|
| Dead cells    |           | Aqua Blue     | 5 $\mu$ l of 1:40 in H <sub>2</sub> O | Pre     | Invitrogen      | Exclusion                        |
| CD3           | SP34.2    | APC-Cy7       | 0.156                                 | IC      | BD Biosciences  | T cells                          |
| CD4           | S3.5      | PE-Cy5.5      | 1.25                                  | Surface | Invitrogen      |                                  |
| CD8           | RPA-T8    | BV570         | 1.25                                  | Surface | BioLegend       |                                  |
| CD45RA        | 5H9       | PE-Cy5        | 0.04                                  | Surface | BD Biosciences  | Memory markers                   |
| CCR7 (CD197)  | G043H7    | BV650         | 10                                    | Surface | BioLegend       |                                  |
| CXCR3 (CD183) | 1C6/CXCR3 | BV711         | 5                                     | Surface | BD Biosciences  | Tfh markers                      |
| CXCR5 (CD185) | MU5UBEE   | PE            | 10                                    | IC      | Thermo Fisher   |                                  |
| PD-1 (CD279)  | EH12.2H7  | BV785         | 2.5                                   | Surface | BD Biosciences  |                                  |
| ICOS (CD278)  | C398.4A   | PE-Cy7        | 0.156                                 | Surface | BioLegend       |                                  |
| CD69          | TP1.55.3  | ECD           | 2.5                                   | IC      | Beckman Coulter | Background reduction             |
| IFN- $\gamma$ | B27       | Ax700         | 0.156                                 | IC      | BioLegend       | Cytokines & Costimulatory ligand |
| IL-2          | MQ1-17H12 | BV750         | 0.625                                 | IC      | BD Biosciences  |                                  |
| TNF           | Mab11     | FITC          | 1.25                                  | IC      | BD Biosciences  |                                  |
| IL-4          | MP4-25D2  | BB700         | 5                                     | IC      | BD Biosciences  |                                  |
| IL-13         | JES10-5A2 | BV421         | 5                                     | IC      | BD Biosciences  |                                  |
| IL-17         | BL168     | BV605         | 5                                     | IC      | BioLegend       |                                  |
| IL-21         | 3A3-N2.1  | Ax647         | 10                                    | IC      | BD Biosciences  |                                  |
| CD154 (CD40L) | 24-31     |               | 5                                     | IC      | BioLegend       |                                  |

IC = intracellular
